# Supplementary material
Source: publisher site journal article supplement (https://www.dovepress.com/article/270204)
Supplement: Supplementary file 1 [file get_supplementary_file.php]

**Supplementary materials**

**Experimental details**

**Methods part:**

1. ***Salmonella* species isolation and identification**

The isolates serotyped in Serology Unit, Animal Health Research Institute, Dokki, Giza following the Kauffman-white scheme using commercially available anti-sera kit (SIFIN, UK).

1. **Synthesis of silver nanoparticles process (yield of each step in synthesis of silver nanoparticles):**

Silver nitrate (AgNO3) acts as silver source, polyvinyl pyrrolidone (PVP) acts as stabilizing agent, sodium borohydride (NaBH4) acts as reducing agent and trisodium citrate acts as both reducing and stabilizing agent.

By mixing AgNO3 and NaBH4 solutions, Ag ions were reduced and clustered to form monodispersed Nanoparticles as a transparent solution in the aqueous medium. The addition of trisodium citrate solution causes the suspension to turn darker yellow, then grey as the nanoparticles aggregate. PVP prevents aggregation and agglomeration of the formed nanoparticles. The reduction reaction can be written as: AgNO3+ NaBH4 →Ag + H2+ B2H6 + NaNO3

1. **Statistical analysis:**

We used Two-way ANOVA to test effects of *S.* Enteritidis infection, silver nanoparticles, and their interaction on the selected hematological and biochemical parameters with Tukey as a post hock test for parametric data. Also, we used One-way ANOVA to test and compare effects of AgNPs and cefotaxime which used for treatment on the same parameters for parametric data. However, Friedman's and Kruskal-Wallis tests were used instead of Two-way ANOVA and One-way ANOVA for non-parametric data, respectively and the data were summarized as (mean±SEM).

**Results part:**

1. **Biochemical findings of isolated *Salmonella* spp.**

Isolates were identified as *Salmonella* species by negativity in oxidase and urease tests, and positivity in the catalase test. Moreover, these isolates showed (K/A/±gas/±H2S) alkaline red slant, acid yellow butt, with or without gas and with or without H2S production in the TSI fermentation test and (K/K/±H2S) alkaline purple slant and butt with or without H2S production in LIA test.

**Tables in details:**

**Table 1A. Percentage of bacterial inhibition at different serial dilutions of silver nanoparticles**

| **Conc.**  **(μg/ml)** | ***S.* ParatyphiA** | | ***S.* Ferruch** | | ***S.* Durham(No. 1)** | | ***S.* Durham(No. 2)** | |
| --- | --- | --- | --- | --- | --- | --- | --- | --- |
| **(mean OD±SD)** | **Inhibition%** | **(meanOD±SD)** | **Inhibition**  **%** | **(meanOD±SD)** | **Inhibition**  **%** | **(meanOD±SD)** | **Inhibition**  **%** |
| **5.000** | 0.007±0.141 | 99.34 | 0.030±0.028 | 98.89 | 0.147±0.011 | 82.23 | 0.293±0.003 | 86.35 |
| **2.500** | 0.084±0.005 | 92.12 | 0.056±0.006 | 97.93 | 0.281±0.025 | 66.02 | 0.436±0.20 | 79.69 |
| **1.250** | 0.154±0.054 | 85.51 | 1.905±0.066 | 29.57 | 0.330±0.024 | 60.10 | 0.503±0.042 | 76.57 |
| **0.625** | 0.367±0.149 | 65.41 | 1.953±0.042 | 27.77 | 0.403±0.035 | 51.27 | 0.759±0.144 | 64.65 |
| **0.313** | 0.701±0.052 | 33.88 | 2.079±0.021 | 23.13 | 0.450±0.084 | 45.59 | 0.778±0.024 | 63.76 |
| **0.156** | 0.722±0.047 | 31.90 | 2.164±0.253 | 19.97 | 0.462±0.028 | 44.14 | 1.130±0.242 | 47.37 |
| **0.078** | 0.734±0.016 | 30.72 | 2.183±0.076 | 19.27 | 0.470±0.050 | 43.17 | 1.215±0.056 | 43.41 |
| **0.039** | 0.751±0.028 | 29.11 | 2.229±0.044 | 17.57 | 0.485±0.061 | 41.35 | 1.386±0.089 | 35.44 |
| **0.020** | 0.760±0.030 | 28.31 | 2.319±0.028 | 14.26 | 0.503±0.016 | 39.18 | 1.448±0.032 | 32.56 |
| **0.010** | 0.778±0.011 | 26.62 | 2.339±0.042 | 13.52 | 0.506±0.013 | 38.81 | 1.697±0.001 | 20.96 |
| **0.005** | 0.777±0.064 | 26.61 | 2.386±0.102 | 11.76 | 0.555±0.018 | 32.89 | 1.756±0.074 | 18.21 |
| **0.002** | 0.783±0.015 | 26.14 | 2.402±0.137 | 11.17 | 0.691±0.008 | 16.44 | 1.900±0.141 | 11.50 |
| **C.C** | 1.059±0.136 |  | 2.704±0.122 |  | 0.827±0.061 |  | 2.147±0.431 |  |

**Table 1B. Percentage of bacterial inhibition at different serial dilutions of silver nanoparticles**

| **Conc.**  **(μg/ml)** | ***S.* Mississippi (No. 1)** | | ***S.* Mississippi (No. 2)** | | ***S.* Mississippi (No. 3)** | | ***S.* Mississippi (No. 4)** | |
| --- | --- | --- | --- | --- | --- | --- | --- | --- |
| **(mean OD±SD)** | **Inhibition%** | **(meanOD±SD)** | **Inhibition**  **%** | **(meanOD±SD)** | **Inhibition**  **%** | **(meanOD±SD)** | **Inhibition**  **%** |
| **5.000** | 0.055±0.065 | 97.21 | 0.197±0.165 | 92.78 | 0.054±0.080 | 94.87 | 0.083±0.009 | 92.45 |
| **2.500** | 0.056±0.026 | 97.16 | 0.294±0.002 | 89.22 | 0.303±0.007 | 71.20 | 0.146±0.004 | 86.73 |
| **1.250** | 1.080±0.092 | 45.26 | 1.175±0.078 | 56.93 | 0.377±0.033 | 64.16 | 0.305±0.039 | 72.27 |
| **0.625** | 1.161±0.116 | 41.16 | 1.269±0.184 | 53.48 | 0.462±0.015 | 56.08 | 0.563±0.004 | 48.82 |
| **0.313** | 1.339±0.187 | 32.13 | 1.345±0.059 | 50.70 | 0.681±0.031 | 35.27 | 0.658±0.045 | 40.18 |
| **0.156** | 1.584±0.238 | 19.72 | 1.625±0.178 | 40.43 | 0.690±0.004 | 34.41 | 0.667±0.063 | 39.36 |
| **0.078** | 1.606±0.235 | 18.60 | 2.007±0.220 | 26.43 | 0.724±0.019 | 31.18 | 0.686±0.008 | 37.64 |
| **0.039** | 1.708±0.102 | 13.43 | 2.093±0.122 | 23.28 | 0.732±0.007 | 30.42 | 0.708±0.006 | 35.64 |
| **0.020** | 1.754±0.118 | 11.10 | 2.169±0.038 | 20.49 | 0.736±0.024 | 30.04 | 0.715±0.006 | 35.00 |
| **0.010** | 1.866±0.148 | 5.42 | 2.175±0.010 | 20.27 | 0.772±0.006 | 26.62 | 0.720±0.063 | 34.55 |
| **0.005** | 1.878±0.049 | 4.82 | 2.189±0.016 | 19.76 | 0.778±0.054 | 26.05 | 0.721±0.033 | 34.45 |
| **0.002** | 1.900±0.071 | 3.70 | 2.322±0.165 | 14.88 | 0.827±0.012 | 21.39 | 0.723±0.103 | 34.27 |
| **C.C** | 1.973±0.324 |  | 2.728±0.134 |  | 1.052±0.109 |  | 1.100±0.049 |  |

**Table 1C. Percentage of bacterial inhibition at different serial dilutions of silver nanoparticles**

| **Conc.**  **(μg/ml)** | ***S.* Mississippi (No. 5)** | | ***S.* Mississippi (No. 6)** | | ***S.* Mississippi (No. 7)** | | ***S.* Mississippi (No. 8)** | |
| --- | --- | --- | --- | --- | --- | --- | --- | --- |
| **(mean OD±SD)** | **Inhibition%** | **(meanOD±SD)** | **Inhibition**  **%** | **(meanOD±SD)** | **Inhibition**  **%** | **(meanOD±SD)** | **Inhibition**  **%** |
| **5.000** | 0.006±0.067 | 99.77 | 2.509±0.003 | 99.91 | 0.195±0.018 | 92.53 | 0.393±0.006 | 84.81 |
| **2.500** | 0.407±0.113 | 84.21 | 2.123±0.078 | 72.91 | 0.389±0.003 | 85.11 | 0.852±0.074 | 67.08 |
| **1.250** | 0.510±0.055 | 80.21 | 2.359±0.028 | 68.08 | 0.523±0.019 | 79.98 | 0.885±0.003 | 65.80 |
| **0.625** | 0.511±0.008 | 80.17 | 1.590±0.075 | 57.87 | 0.764±0.003 | 70.75 | 1.009±0.008 | 61.01 |
| **0.313** | 0.614±0.125 | 76.17 | 1.341±0.116 | 57.50 | 0.792±0.008 | 69.68 | 1.059±0.028 | 59.08 |
| **0.156** | 0.893±0.128 | 65.35 | 1.244±0.115 | 57.50 | 0.818±0.042 | 68.53 | 1.354±0.313 | 47.68 |
| **0.078** | 1.056±0.024 | 59.02 | 1.369±0.157 | 51.66 | 1.022±0.185 | 60.87 | 1.838±0.022 | 28.98 |
| **0.039** | 1.533±0.125 | 40.51 | 1.728±0.083 | 35.11 | 1.407±0.233 | 46.13 | 1.890±0.602 | 26.97 |
| **0.020** | 1.595±0.185 | 38.11 | 1.883±0.048 | 27.86 | 1.896±0.527 | 27.41 | 1.931±0.008 | 25.39 |
| **0.010** | 1.827±0.137 | 29.10 | 1.859±0.038 | 28.80 | 2.031±0.064 | 22.24 | 2.190±0.124 | 15.38 |
| **0.005** | 2.180±0.446 | 15.41 | 1.918±0.038 | 25.85 | 2.198±0.096 | 15.85 | 2.532±0.027 | 2.16 |
| **0.002** | 2.170±0.136 | 15.79 | 2.158±0.063 | 13.45 | 2.240±0.278 | 14.24 | 2.561±0.061 | 1.04 |
| **C.C** | 2.577±0.513 |  | 2.193±0.126 |  | 2.612±0.104 |  | 2.588±0.270 |  |

**Table 1D. Percentage of bacterial inhibition at different serial dilutions of silver nanoparticles**

| **Conc.**  **(μg/ml)** | ***S.* Mississippi (No. 9)** | | ***S.* Stanleyville** | | ***S.* Mississippi (No. 10)** | | ***S.* Kottbus** | |
| --- | --- | --- | --- | --- | --- | --- | --- | --- |
| **(mean OD±SD)** | **Inhibition%** | **(meanOD±SD)** | **Inhibition**  **%** | **(meanOD±SD)** | **Inhibition**  **%** | **(meanOD±SD)** | **Inhibition**  **%** |
| **5.000** | 0.006±0.061 | 99.66 | 0.064±0.004 | 93.47 | 0.231±0.037 | 89.48 | 0.009±0.068 | 99.19 |
| **2.500** | 1.122±0.107 | 36.61 | 0.118±0.110 | 87.86 | 0.414±0.059 | 81.14 | 0.054±0.039 | 95.20 |
| **1.250** | 1.174±0.009 | 33.67 | 0.241±0.018 | 75.26 | 0.531±0.019 | 75.81 | 0.536±0.093 | 51.95 |
| **0.625** | 1.249±0.255 | 29.44 | 0.301±0.108 | 69.08 | 0.857±0.276 | 60.96 | 0.538±0.024 | 51.77 |
| **0.313** | 1.412±0.336 | 20.23 | 0.342±0.006 | 64.87 | 0.890±0.047 | 59.45 | 0.607±0.040 | 45.63 |
| **0.156** | 1.484±0.134 | 16.16 | 0.552±0.038 | 43.21 | 1.013±0.096 | 53.85 | 0.628±0.015 | 43.74 |
| **0.078** | 1.501±0.061 | 15.20 | 0.762±0.039 | 21.66 | 1.085±0.258 | 50.57 | 0.753±0.064 | 32.54 |
| **0.039** | 1.528±0.144 | 13.67 | 0.807±0.012 | 17.03 | 1.105±0.105 | 49.66 | 0.755±0.001 | 32.31 |
| **0.020** | 1.621±0.184 | 8.42 | 0.808±0.002 | 16.92 | 1.254±0.283 | 42.87 | 0.765±0.018 | 31.46 |
| **0.010** | 1.649±0.317 | 6.84 | 0.809±0.006 | 16.82 | 1.521±0.182 | 30.71 | 0.772±0.029 | 30.84 |
| **0.005** | 1.728±0.083 | 2.43 | 0.827±0.006 | 14.97 | 1.754±0.079 | 20.09 | 0.772±0.018 | 30.84 |
| **0.002** | 1.730±0.082 | 2.32 | 0.832±0.001 | 14.40 | 1.953±0.032 | 11.03 | 0.783±0.011 | 29.85 |
| **C.C** | 1.771±0.235 |  | 0.972±0.340 |  | 2.195±0.125 |  | 1.115±0.071 |  |

**Table 1E. Percentage of bacterial inhibition at different serial dilutions of silver nanoparticles**

| **Conc.**  **(μg/ml)** | ***S.* Bonariensis** | | ***S.* Allerton** | | ***S.* Enteritidis (No. 1)** | | ***S.* Enteritidis (No. 2)** | |
| --- | --- | --- | --- | --- | --- | --- | --- | --- |
| **(mean OD±SD)** | **Inhibition%** | **(meanOD±SD)** | **Inhibition**  **%** | **(meanOD±SD)** | **Inhibition**  **%** | **(meanOD±SD)** | **Inhibition**  **%** |
| **5.000** | 0.060±0.00 | 97.57 | 0.004±0.106 | 99.81 | 0.001±0.055 | 99.92 | 0.028±0.109 | 99.01 |
| **2.500** | 0.140±0.052 | 94.33 | 0.015±0.022 | 99.42 | 0.038±0.100 | 96.96 | 0.323±0.004 | 88.55 |
| **1.250** | 1.689±0.111 | 31.64 | 0.296±0.114 | 88.48 | 0.109±0.104 | 91.27 | 1.293±0.025 | 54.18 |
| **0.625** | 1.718±0.059 | 30.47 | 0.591±0.179 | 77.02 | 0.263±0.001 | 78.99 | 1.312±0.033 | 53.51 |
| **0.313** | 1.757±0.025 | 28.89 | 0.764±0.253 | 70.27 | 0.372±0.007 | 70.22 | 1.448±0.086 | 48.69 |
| **0.156** | 1.864±0.078 | 24.55 | 1.019±0.080 | 60.37 | 0.424±0.086 | 66.06 | 1.561±0.065 | 44.68 |
| **0.078** | 1.911±0.056 | 22.65 | 1.117±0.025 | 56.56 | 0.725±0.015 | 42.01 | 1.611±0.128 | 42.91 |
| **0.039** | 1.999±0.153 | 19.07 | 1.518±0.047 | 40.93 | 0.829±0.002 | 33.68 | 1.732±0.058 | 38.63 |
| **0.020** | 2.048±0.014 | 17.09 | 1.530±0.371 | 40.47 | 0.831±0.008 | 33.48 | 2.204±0.083 | 21.90 |
| **0.010** | 2.064±0.060 | 16.46 | 1.592±0.032 | 38.23 | 0.843±0.091 | 32.56 | 2.267±0.056 | 19.67 |
| **0.005** | 2.202±0.225 | 10.85 | 1.600±0.027 | 37.74 | 0.886±0.013 | 29.12 | 2.300±0.107 | 18.50 |
| **0.002** | 2.217±0.146 | 10.26 | 1.688±0.001 | 34.32 | 0.905±0.045 | 27.60 | 2.632±0.000 | 6.73 |
| **C.C** | 2.470±0.174 |  | 2.570±0.193 |  | 1.249±0.109 |  | 2.822±0.136 |  |

Concentration inhibiting at least 20% of bacterial growth is considered MIC.

MIC – Minimum inhibitory concentration,

SD – Standard deviation,

OD – Optical density.

C.C- Culture Control**.**
